# Supplementary material
Source: PubMed Central journal article supplement (PMC7086040)
Supplement: supp_RA119.011849_157047_1_supp_474517_q5lw5v.pdf [file supp_RA119.011849_157047_1_supp_474517_q5lw5v.pdf]

# Supplementary Figure S1

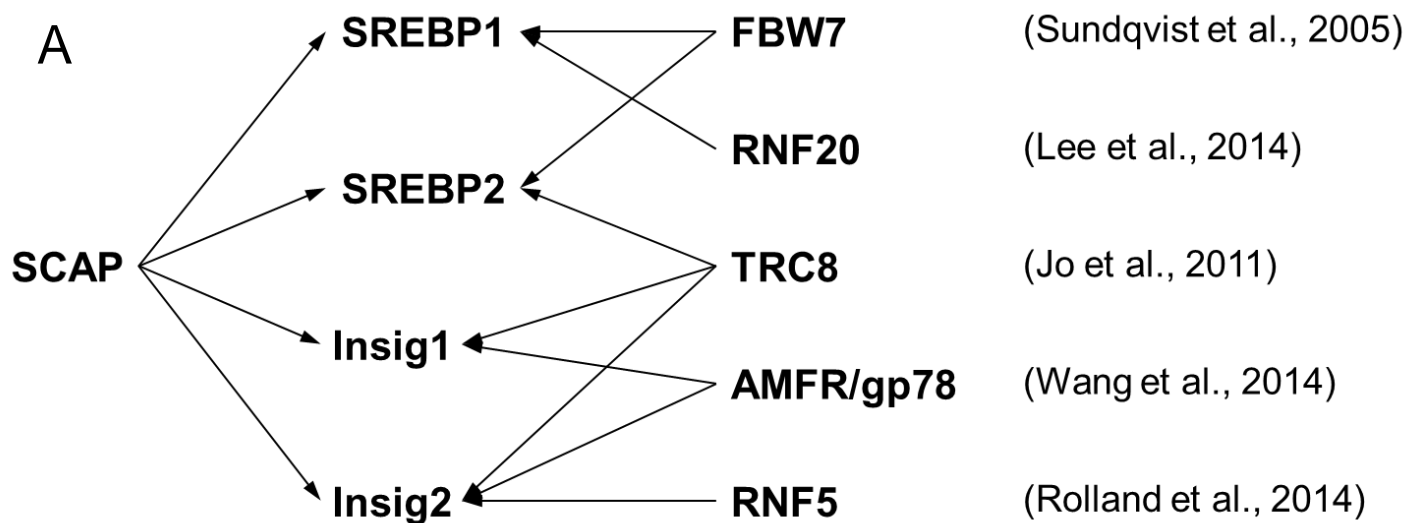

**B**

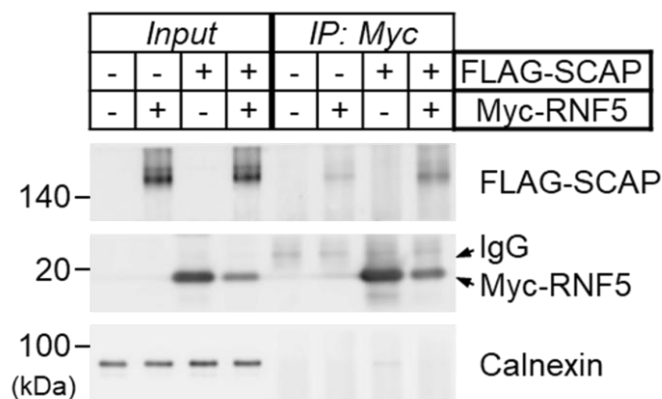

**C**

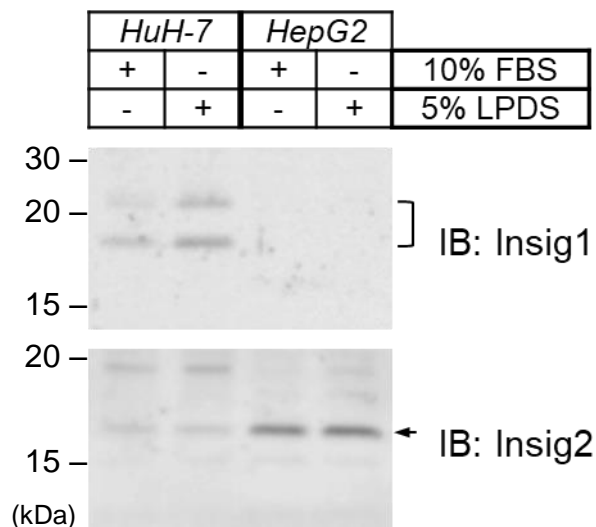

**Figure S1. A**, Known E3 ligases reported to form protein complex with Insig and SREBP. **B**, HEK293 cells were transfected with indicated plasmids for anti-Myc-RNF5 IP as described in Figure 1C and 1D. **C**, HuH-7 and HepG2 cells were seeded in 6-well plates and cultured until cell density reached 70% confluent. The cells were then switched into DMEM supplemented with either 10% (v/v) FBS or 5% (v/v) LPDS and cultured for 16 h and then harvested for immunoblot analysis.

# Supplementary Figure S2-R

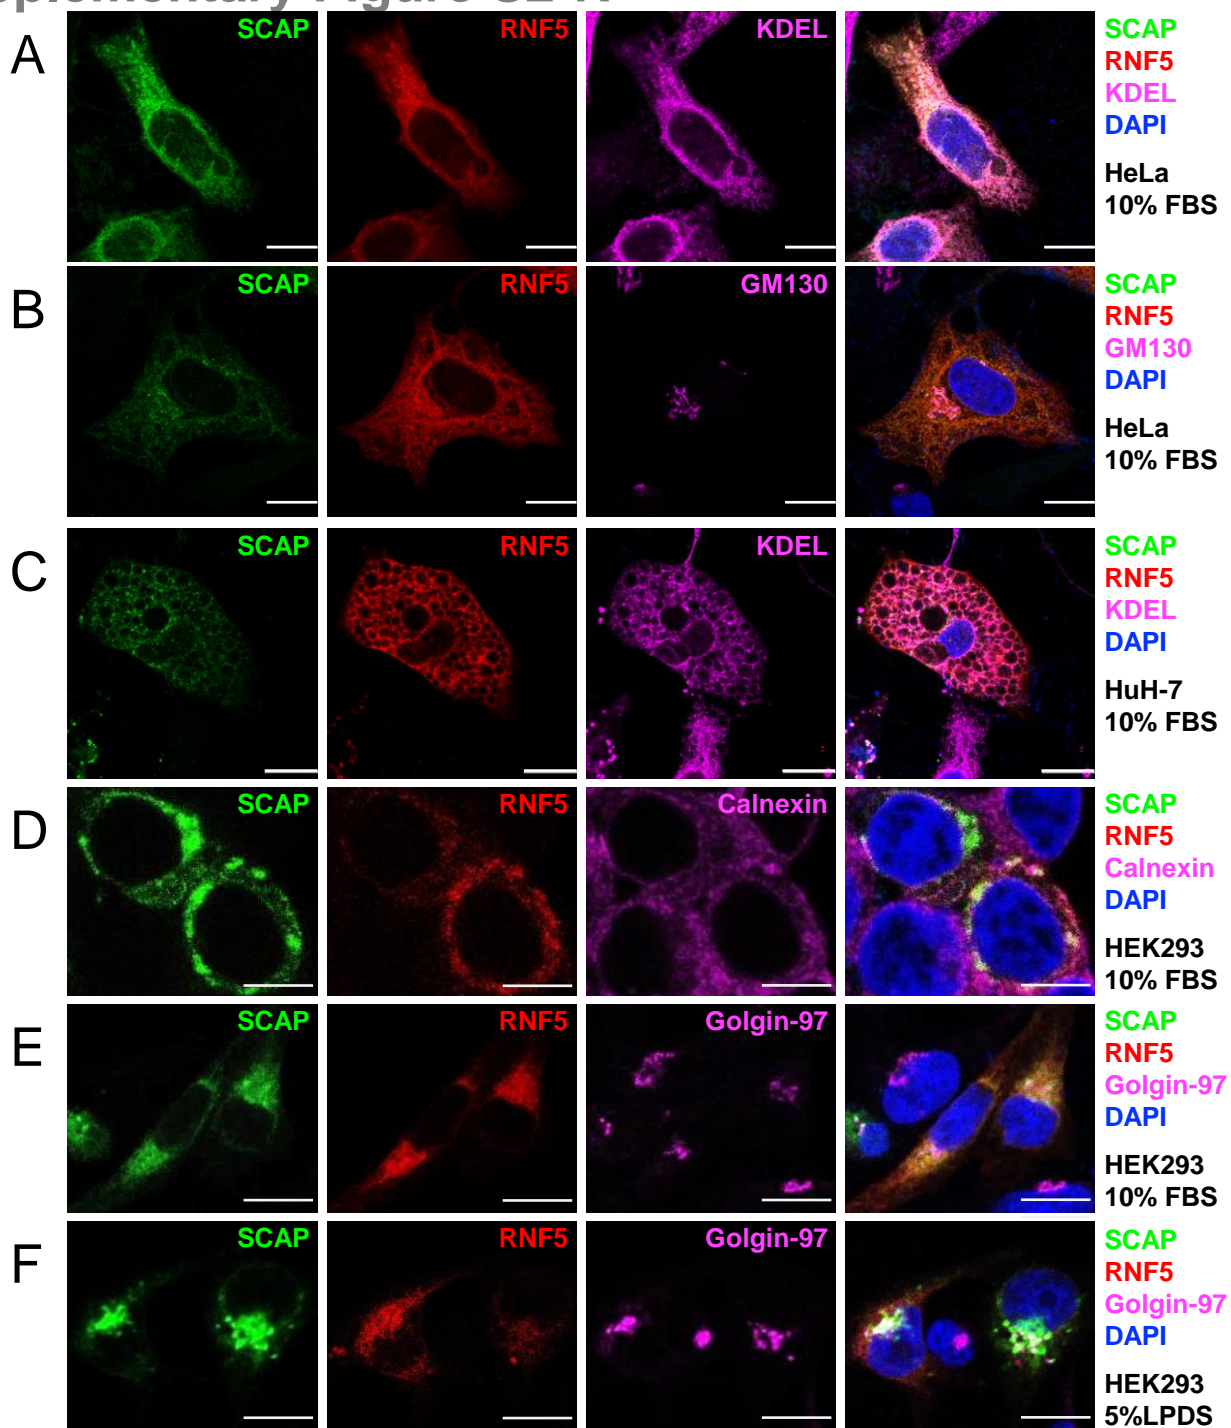

**Figure S2.** The localization of RNF5 and SCAP was determined by confocal microscopy. EGFP-SCAP and mCherry-RNF5 expression plasmids were co-transfected in HeLa (**A**, **B**), Huh7 (**C**), and HEK293 (**D** – **F**) cells, and cultured in complete medium (10%FBS) (**A** – **E**) or sterol-depleted medium (5%LPDS) (**F**). The cells were fixed, permeabilized, and stained with anti-KDEL (**A**, **C**), anti-GM130 (**B**), anti-calnexin (**D**), or anti-Gogin97 (**E**, **F**) antibodies followed by AlexaFluor647-conjugated secondary antibodies. Nuclei were stained with DAPI. (Scale bar, 10 nm)

# Supplementary Figure S3

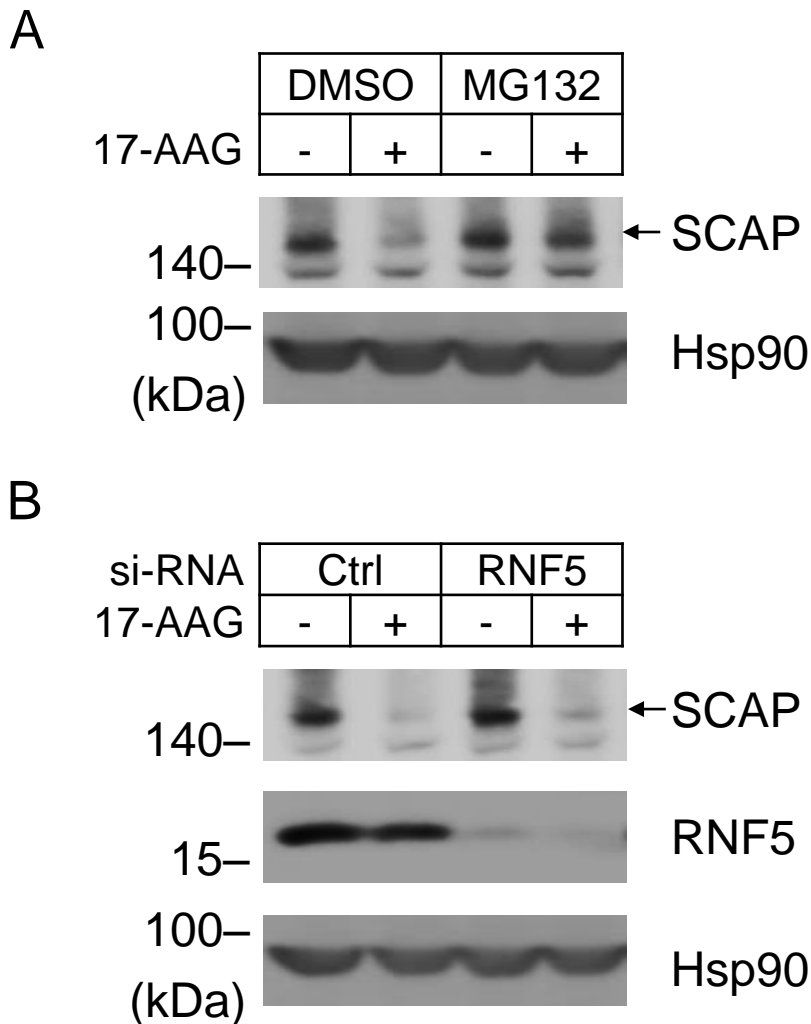

**Figure S3. A**, HuH-7 cells were seeded in 6-well plates and cultured until cell density reached to 80% confluent. The cells were then switched to fresh medium containing 2.5  $\mu$ M MG132 or 0.025% DMSO and cultured for 30 min. After preincubation with MG132, 1  $\mu$ M of 17-AAG or equal volume of 0.001% DMSO were applied to the cells. The cells were then cultured for 12 h and then harvested for immunoblot analysis. **B**, HuH-7 cells were seeded in 6-well plates and cultured until cell density reached to 50% confluent. The cells were then transfected with control or RNF5 siRNA and cultured for 36 h. The cells were then switched into fresh medium containing 1  $\mu$ M of 17-AAG or equal volume of 0.001% DMSO and cultured for 12 h. The cells were then harvested for immunoblot analysis.

# Supplementary Figure S3

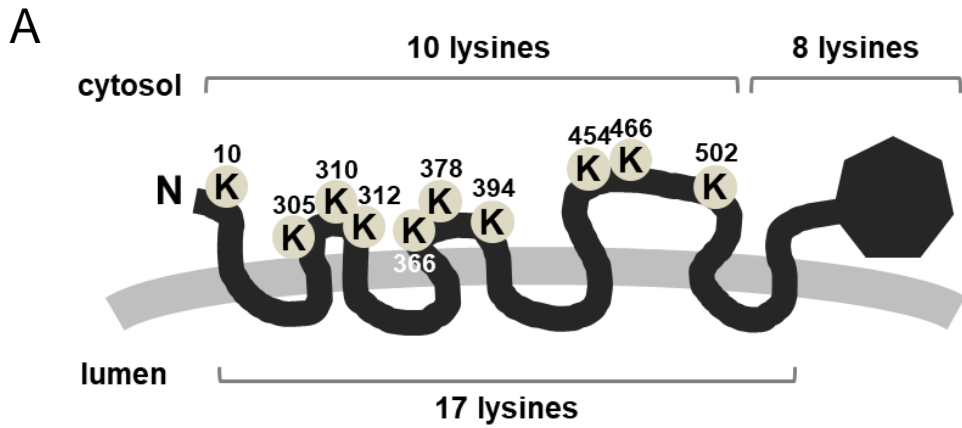

**B**

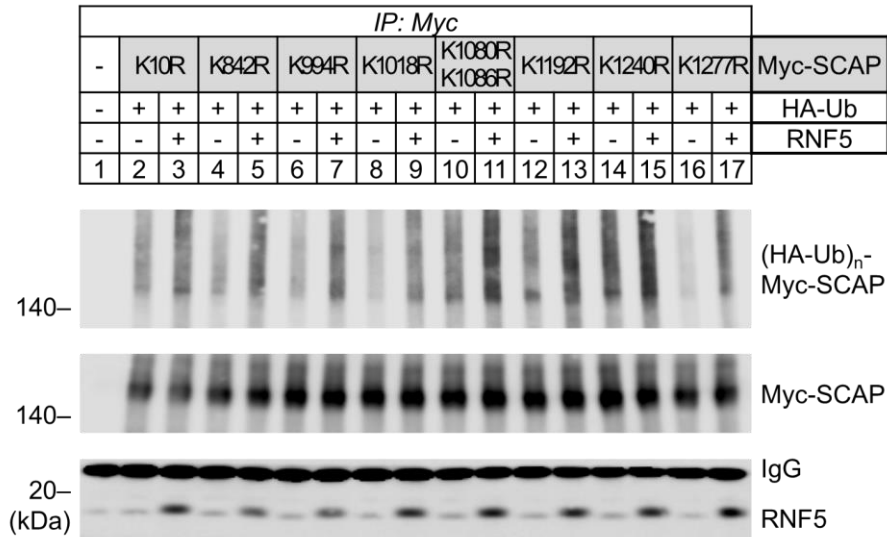

**Figure S4. A**, Schematic illustration of lysine residues on the cytosolic loops of SCAP. **B**, SRD-13A cells were treated as described in Figure 4A for anti-Myc-SCAP IP.

# Supplementary Figure S4

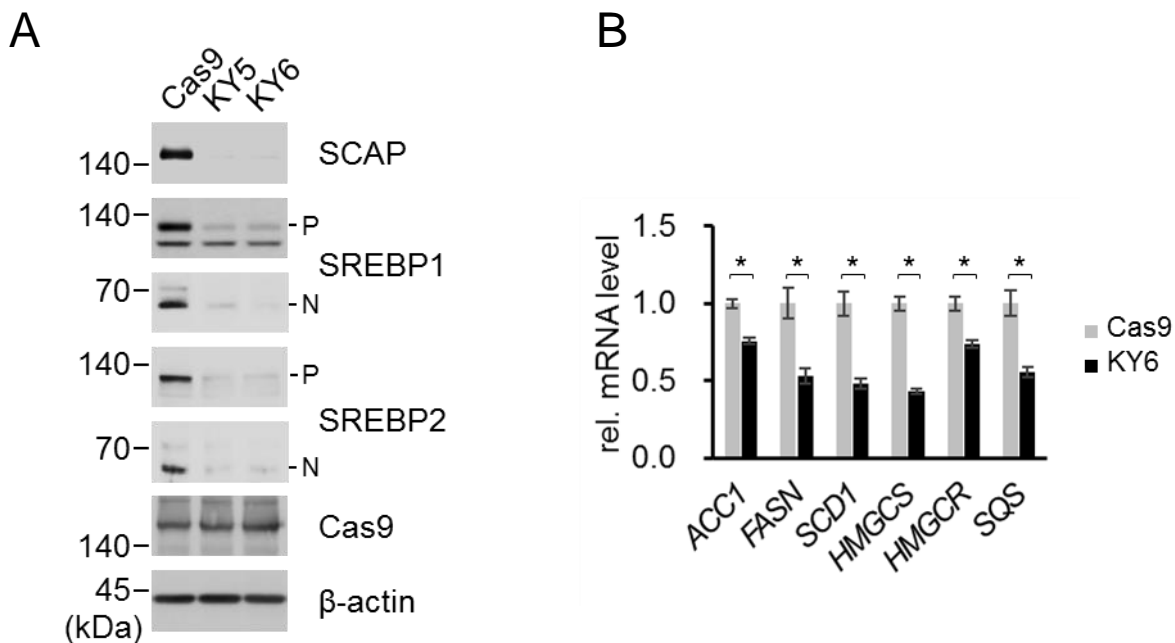

**Figure S5. Establishing SCAP-deficient HEK293 cell lines.** **A**, HEK293 cells were transfected with Cas9 expression plasmids in the presence or absence of a guide RNA targeting exon 2 of human SCAP. Two lines of HEK293 cells were examined by immunoblot analysis and showed no detectable SCAP protein and drastic reduced level of SREBP proteins. These SCAP-deficient lines were named as KY5 and KY6. Another line derived from the cells transfected with Cas9 plasmid only was maintained as a control and named as Cas9.(26). **B**, Cas9 and KY6 cells were seeded in 12-well plates and cultured until cell density reached 90% confluent. The cells were then harvested for total RNA extraction followed by reverse transcription and quantitative PCR. Data are pooled from two independent experiments performed in triplicate and presented as mean  $\pm$  S.D. ( $n = 6$ ). Asterisks indicate difference between groups were significant as determined by two-tailed unpaired Student's *t*-tests ( $p < 0.00005$ ).

# Supplementary Figure S5

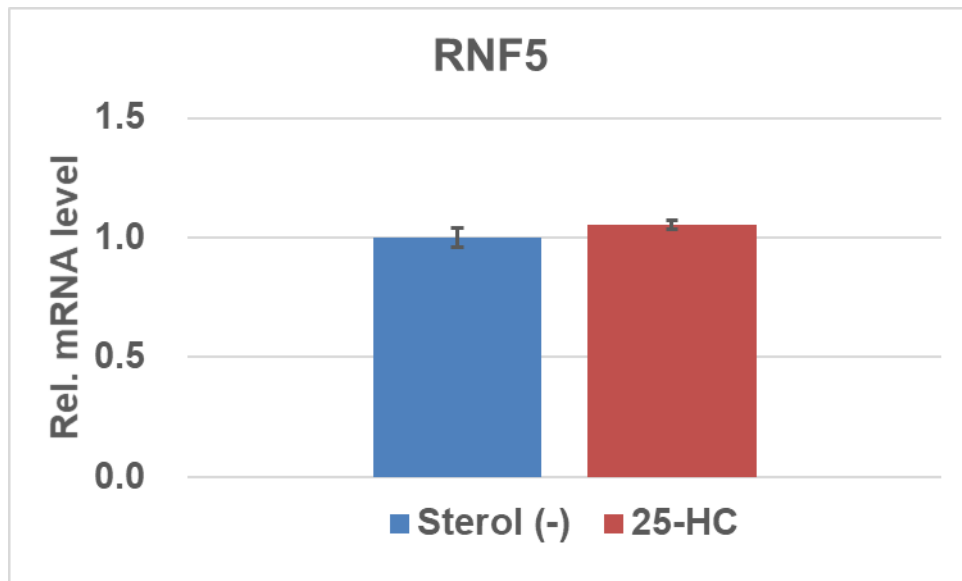

**Figure S6. *RNF5* gene expression was not changed by 25-hydroxylcholesterol.** HuH-7 cells were cultured until cell density reached to 70% confluent. The cells were then switched to DMEM supplemented with 5% LPDS, 50  $\mu$ M sodium mevalonate, and 12.5  $\mu$ M Fluvastatin in the presence of 1  $\mu$ g/ml 25-hydroxylcholesterol or equal volume of ethanol. The cells were cultured for 16 h and then harvested for total RNA extraction followed by reverse transcription and quantitative PCR. Data are pooled from two independent experiments performed in triplicate and presented as mean  $\pm$  S.D. ( $n = 6$ ).
